## CORRECTION

# Correction: Correction: Isometric *versus* isotonic exercise in individuals with rotator cuff tendinopathy—Effects on shoulder pain, functioning, muscle strength, and electromyographic activity: A protocol for randomized clinical trial

The *PLOS ONE* Staff

## Notice of Republication

There was an error in the names of the first and second authors in the correction published on January 19, 2024. This correction notice has been republished on February 15, 2024, to rectify the error. The publisher apologizes for the error. Please download this notice again to view the correct version.

## References

1. Rodrigues da Silva Barros B, Dal'Ava Augusto D, de Medeiros Neto JF, Michener LA, Silva RS, Sousa CdO (2023) Isometric versus isotonic exercise in individuals with rotator cuff tendinopathy—Effects on shoulder pain, functioning, muscle strength, and electromyographic activity: A protocol for randomized clinical trial. *PLoS ONE* 18(11): e0293457. <https://doi.org/10.1371/journal.pone.0293457> PMID: 37956135
2. Rodrigues da Silva Barros B, Dal'Ava Augusto D, Filho JFdM, Michener LA, Silva RS, Sousa CdO (2024) Correction: Isometric versus isotonic exercise in individuals with rotator cuff tendinopathy—Effects on shoulder pain, functioning, muscle strength, and electromyographic activity: A protocol for randomized clinical trial. *PLoS ONE* 19(1): e0297630. <https://doi.org/10.1371/journal.pone.0297630> PMID: 38241237

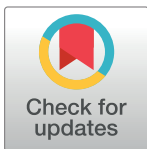

## OPEN ACCESS

**Citation:** The *PLOS ONE* Staff (2024) Correction: Correction: Isometric *versus* isotonic exercise in individuals with rotator cuff tendinopathy—Effects on shoulder pain, functioning, muscle strength, and electromyographic activity: A protocol for randomized clinical trial. *PLoS ONE* 19(3): e0300483. <https://doi.org/10.1371/journal.pone.0300483>

**Published:** March 7, 2024

**Copyright:** © 2024 The *PLOS ONE* Staff. This is an open access article distributed under the terms of the [Creative Commons Attribution License](https://creativecommons.org/licenses/by/4.0/), which permits unrestricted use, distribution, and reproduction in any medium, provided the original author and source are credited.
